# Supplementary material
Source: PubMed Central journal article supplement (PMC3240687)
Supplement: NIHMS329709-supplement-Supp_Table_S1.pdf [file NIHMS329709-supplement-Supp_Table_S1.pdf]

**Supp. Table S1. List of Current ENIGMA membership**

|                         |                                                |     |
|-------------------------|------------------------------------------------|-----|
| David Goldgar           | University of Utah                             | USA |
| Fergus Couch,           | Mayo Clinic                                    | USA |
| James D. Fackenthal     | University of Chicago                          | USA |
| Mads Thomassen          | Odense University Hospital                     | DK  |
| Soo H Teo               | Cancer Research Initiatives Foundation         | MY  |
| Thomas v. O. Hansen     | Rigshospitalet, Copenhagen University Hospital | DK  |
| Åke Borg                | Lund University                                | SWE |
| Ros Eeles               | Institute of Cancer Research                   | UK  |
| Amanda Toland           | The Ohio State University                      | USA |
| Peter Rogan             | University of Western Ontario                  | CAN |
| Thomas v. O. Hansen     | Rigshospitalet, Copenhagen University Hospital | DK  |
| Lucia Guidugli          | Mayo Clinic                                    | USA |
| Lawrence C. Brody       | National Human Genome Research Institute       | USA |
| Sue Healey              | Queensland Institute of Medical Research       | AUS |
| Melissa Brown           | The University of Queensland                   | AUS |
| Ava Kwong               | Hong Kong Sanitorium & Hospital                | HK  |
| Chris Wong Lei-po       | Hong Kong Sanitorium & Hospital                | HK  |
| Heli Nevanlinna         | Helsinki University Central Hospital           | FI  |
| Judy Garber             | Dana Farber Cancer Institute                   | USA |
| Lenka Foretova          | Masaryk Memorial Cancer Institute              | CZ  |
| Christian F Singer, MD  | Medical University of Vienna                   | AT  |
| M.J. Blok               | Maastricht University Medical Centre           | NL  |
| Amanda B Spurdle        | Queensland Institute of Medical Research       | AUS |
| Ana Osorio              | CNIO                                           | SP  |
| Zsofia Kote-Jarai       | Institute of Cancer Research                   | UK  |
| Barbara Wappenschmidt   | University Hospital of Cologne                 | DE  |
| Diana Baralle           | University of Southampton                      | UK  |
| Ana Vega                | Fundacion Publica Galega de Medicina Xenomica  | SP  |
| Ana Blanco              | Fundacion Publica Galega de Medicina Xenomica  | SP  |
| Marta Santamariña       | University of Santiago de Compostela           | SP  |
| Laura Fachal            | Fundacion Publica Galega de Medicina Xenomica  | SP  |
| Petra Nederlof          | Netherlands Cancer Institute, Amsterdam, NL    | NL  |
| Susan Peock             | University of Cambridge                        | UK  |
| Barbara Pasini          | University of Turin                            | IT  |
| Stefania Tommasi N      | CC "Giovanni Paolo II", Bari (I)               | IT  |
| Alan Lafferty           | West of Scotland Regional Genetics Service     | UK  |
| Aisha Ansari            | West of Scotland Regional Genetics Service     | UK  |
| Irene Konstantopoulou   | NCSR Demokritos, GR                            | GR  |
| Tuya Pal                | Moffit Cancer Center                           | USA |
| Jacques Simard          | University of Laval                            | CAN |
| Andrea Bonetti          | Mater Salutis Hospital Legnago ITALY           | IT  |
| Liliana Varesco         | IST Genova                                     | IT  |
| Bernard Peissel         | Istituto Nazionale Tumori, Milano              | IT  |
| D Gareth Evans          | Manchester Academic Health Science Centre,     | UK  |
| Will Foulkes            | McGill University                              | CAN |
| Csilla Szabo            | University of Delaware                         | USA |
| Christi van Asperen     | Leiden University Medical Center, Netherland   | NL  |
| Jos Jonkers             | Netherlands Cancer Institute                   | NL  |
| Logan Walker            | University of Otago                            | NZ  |
| Gillian Mitchell        | Peter MacCallum Cancer Centre, Australia       | AUS |
| Sara Gutiérrez-Enríquez | Vall d'Hebron Institute of Oncology            | SP  |
| Orland Diez             | Vall d'Hebron Institute of Oncology            | SP  |
| Gael Millot             | Institut Curie                                 | FR  |

|                       |                                                       |     |
|-----------------------|-------------------------------------------------------|-----|
| Florentia Fostira     | NSCR Demokritos Athens                                | GR  |
| Christina Selkirk     | NorthShore University HealthSystem                    | USA |
| Antonis Antoniou      | University of Cambridge                               | UK  |
| Alvaro Monteiro       | Moffit Cancer Center                                  | USA |
| Marcelo Carvalho      | INCA/IFRJ, Brazil                                     | BR  |
| Wendy S. Rubinstein   | NorthShore University HealthSystem                    | USA |
| Miguel de la Hoya     | Hospital Clínico San Carlos                           | SP  |
| Susan Domchek         | University of Pennsylvania                            | USA |
| Sandrine Caputo       | Institut Curie                                        | FR  |
| Claude Houdayer       | Institut Curie and Université Paris Descartes         | FR  |
| Ignacio Blanco        | Institut Catala` d'Oncologia                          | SP  |
| Conxi Lázaro          | Institut Catala` d'Oncologia                          | SP  |
| Phillip Whiley        | Queensland Institute of Medical Research              | AUS |
| Alexandra Becker      | Centre for Breast and Ovarian Cancer Cologne          | DE  |
| Paolo Aretini         | University Hospital of Pisa                           | IT  |
| Diana Eccles          | University of Southampton                             | UK  |
| Trinidad Caldes       | Hospital Clínico San Carlos                           | SP  |
| Alessandra Viel       | Centro di Riferimento Oncologico (CRO), IRCCS, Aviano | IT  |
| Louise Izatt          | Guy's and St. Thomas' NHS Foundation Trust, London    | UK  |
| Frans Hogervorst      | Nettherlands Cancer Institute, Amsterdam, NL          | NL  |
| Paolo Radice          | Fondazione IRCCS Istituto Nazionale Tumori, Milan     | IT  |
| Kate Nathanson        | University of Pennsylvania                            | USA |
| Inge Søkilde Pedersen | Aalborg Universityhospital                            | DK  |
| Maike Vreeswijk       | Leiden University Medical Center, NL                  | NL  |
| Susan Neuhausen       | Beckman Research Institute of the City of Hope        | USA |
| Koulis Yannoukacos    | NCSR Demokritos, GR                                   | GR  |
| Kathy Tucker          | Prince of Wales Hospital, Sydney Australia            | AUS |
| Melissa Southey       | Melbourne University                                  | AUS |
| Jenny Leary           | Westmead Hospital Australia                           | AUS |
| Maria Adelaide Caligo | University of Pisa                                    | IT  |
| Encarna Gomez Garcia  | Maastricht University Medical Centre                  | NL  |
| Andrew Devereau       | National Genetics Reference Laboratory                | UK  |
| Rita Brandao          | Maastricht University Medical Centre                  | NL  |
| Rosette Lidereau      | Institut Curie, Paris                                 | FR  |
| Marco Montagna        | Istituto Oncologico Veneto, Italy                     | IT  |
| Maroulio Pertesi      | International Agency for Research and Cancer          | FR  |
| Mike Cornell          | National Genetics Reference Laboratory                | UK  |
| Etienne Rouleau       | Institut Curie                                        | FR  |
| Shyam Sharan          | National Human Genome Research Institute              | USA |
| Nazneen Rahman        | Institue of Cancer Research                           | UK  |
| Fiona Laloo           | Manchester Academic Health Science Centre,            | UK  |
| Jeff Weitzel          | Beckman Research Institute of the City of Hope        | USA |
| Joanna Campbell       | Guy's and St. Thomas' NHS Foundation Trust, London    | UK  |
| Cummings              | University of Chicago                                 | USA |
| Eva Machakova         | Masaryk Memorial Cancer Institute                     | CZ  |
| Funmi Olopade         | University of Chicago                                 | USA |
| BCFR                  | University of Utah                                    | USA |
| Andy Godwin           | University of Kansas Medical Center                   | USA |
| Hilmi Ozcelik         | Samuel Lunenfeld Research Institute                   | CAN |
| Daniela Seminara      | National Cancer Institute                             | USA |
